# Supplementary material for: “I Always Feel Like I Have to Rush…” Pet Owner and Small Animal Veterinary Surgeons’ Reflections on Time during Preventative Healthcare Consultations in the United Kingdom
Source: Vet Sci. 2018 Feb 8;5(1):20. doi: 10.3390/vetsci5010020 (PMC5876559; doi:10.3390/vetsci5010020)
Supplement: Supplementary file 1 [file vetsci-05-00020-s001.pdf]

Article

**“I Always Feel Like I Have to Rush...” Pet Owner and Small Animal Veterinary Surgeons’ Reflections on Time during Preventative Healthcare Consultations in the United Kingdom**

**Supplementary materials:**

**Table S1. Demographic details of owners interviewed, and their pets. Table reproduced from [13].**

| Owner ID | Sex    | Owner employment status and job type       | Owner location | Owned pets previously? | Veterinary practice type attended | Demographics details of pets currently owned                                                                                                                              |
|----------|--------|--------------------------------------------|----------------|------------------------|-----------------------------------|---------------------------------------------------------------------------------------------------------------------------------------------------------------------------|
| 1        | Female | Working, healthcare                        | North England  | No                     | Independent                       | 4 year old male neutered Lhasa Apso dog                                                                                                                                   |
| 2        | Female | Working, undisclosed non-science job       | Scotland       | No                     | Independent                       | 2 year old female neutered golden-doodle dog                                                                                                                              |
| 3        | Female | Working, animal care                       | North England  | Yes                    | Independent                       | 3 year old female neutered dachshund dog<br>3 year old female neutered poodle cross dog                                                                                   |
| 4        | Female | Working, undisclosed non-science based job | North England  | Yes                    | Independent                       | 3 year old female neutered domestic shorthaired rescue cat                                                                                                                |
| 5        | Female | Working, scientist                         | Midlands       | Yes                    | Independent                       | 11 year old male entire working cocker spaniel gundog<br>6 year old female entire working cocker spaniel gundog<br>2 year old female entire working cocker spaniel gundog |
| 6        | Female | Working, undisclosed non-science job       | North England  | Yes                    | Independent                       | 8 year old female neutered Bedlington terrier rescue dog                                                                                                                  |
| 7        | Female | Working, customer service                  | North England  | Yes                    | Independent                       | 8 year old female neutered golden-doodle dog<br>3 year old female neutered golden-doodle dog<br>9 year old female entire toy poodle dog                                   |
| 8        | Female | Working, undisclosed non-science job       | Midlands       | Yes                    | Independent                       | 8 year old male neutered cockerpoo agility dog<br>7 year old female neutered cockerpoo agility dog                                                                        |
| 9        | Female | Working, undisclosed non-science job       | North England  | No                     | Independent                       | 6 year old female neutered domestic shorthaired cat<br>5 year old male neutered domestic longhaired cat<br>3 year old male neutered Chihuahua dog                         |
| 10       | Female | Retired                                    | North England  | Yes                    | Independent                       | 4 month old male entire cockerpoo dog                                                                                                                                     |
| 11       | Female | Working, undisclosed non-science job       | North England  | Yes                    | Independent                       | 7 year old male neutered cavalier king Charles spaniel dog                                                                                                                |
| 12       | Female | Working, child care                        | North England  | No                     | Corporate                         | 6 month old female entire working cocker spaniel dog                                                                                                                      |
| 13       | Female | Retired                                    | North England  | Yes                    | Independent                       | 2 year old male neutered lurcher dog                                                                                                                                      |
| 14       | Female | Working, animal care                       | North England  | No                     | Corporate                         | 5 year old male neutered labradoodle dog<br>4 year old male neutered labradoodle dog                                                                                      |
| 15       | Female | Retired                                    | North England  | Yes                    | Corporate                         | 2 year old female neutered crossbreed dog<br>10 year old male neutered west highland white terrier dog                                                                    |

**Table S2. Demographic detail of the veterinary surgeons interviewed and their practices Table reproduced from [13].**

| Veterinary surgeon ID | Sex    | Year of graduation | Country where veterinary education undertaken | Position within practice | Practice location  | Practice description                     | Standard preventative medicine consultation length (minutes) |
|-----------------------|--------|--------------------|-----------------------------------------------|--------------------------|--------------------|------------------------------------------|--------------------------------------------------------------|
| 1                     | Female | 2004               | UK                                            | Senior vet               | North England      | Small animal, independent, multi-branch  | 15                                                           |
| 2                     | Male   | 2015               | UK                                            | Assistant                | North England      | Small animal, independent, multi-branch  | 15                                                           |
| 3                     | Female | 2008               | UK                                            | Assistant                | Wales              | Small animal, independent, multi-branch  | 10                                                           |
| 4                     | Female | 2003               | UK                                            | Assistant                | South East England | Mixed, independent, multi-branch         | 10–20                                                        |
| 5                     | Female | 2000               | UK                                            | Clinical director        | South England      | Small animal, corporate, multi-branch    | 15                                                           |
| 6                     | Female | 2001               | UK                                            | Assistant                | South East England | Small animal, corporate, multi-branch    | 15–20                                                        |
| 7                     | Male   | 2006               | Hungary                                       | Clinical director        | South East England | Small animal, corporate, single branch   | 15                                                           |
| 8                     | Male   | 1988               | UK                                            | Partner                  | Midlands           | Small animal, independent, single branch | 10                                                           |
| 9                     | Female | 2003               | USA                                           | Clinical Director        | Midlands           | Small animal, corporate, single branch   | 20                                                           |
| 10                    | Female | 2004               | UK                                            | Assistant                | Scotland           | Small animal, independent, multi-branch  | 15                                                           |
| 11                    | Female | 2005               | UK                                            | Assistant                | North England      | Small animal, independent, multi-branch  | 10                                                           |
| 12                    | Male   | 2008               | UK                                            | Assistant                | North England      | Mixed, independent, single branch        | 10                                                           |
| 13                    | Female | 2008               | Ireland                                       | Assistant                | Scotland           | Small animal, independent, multi-branch  | 15                                                           |
| 14                    | Female | 1993               | UK                                            | Assistant                | South West England | Small animal, independent, multi-branch  | 15                                                           |

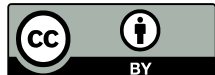

© 2018 by the authors. Submitted for possible open access publication under the terms and conditions of the Creative Commons Attribution (CC BY) license (<http://creativecommons.org/licenses/by/4.0/>).
